# Supplementary material
Source: ML conference proceedings conference paper supplement (https://aclanthology.org/2026.semeval-1.341)

Track B Validation Accuracy by Method

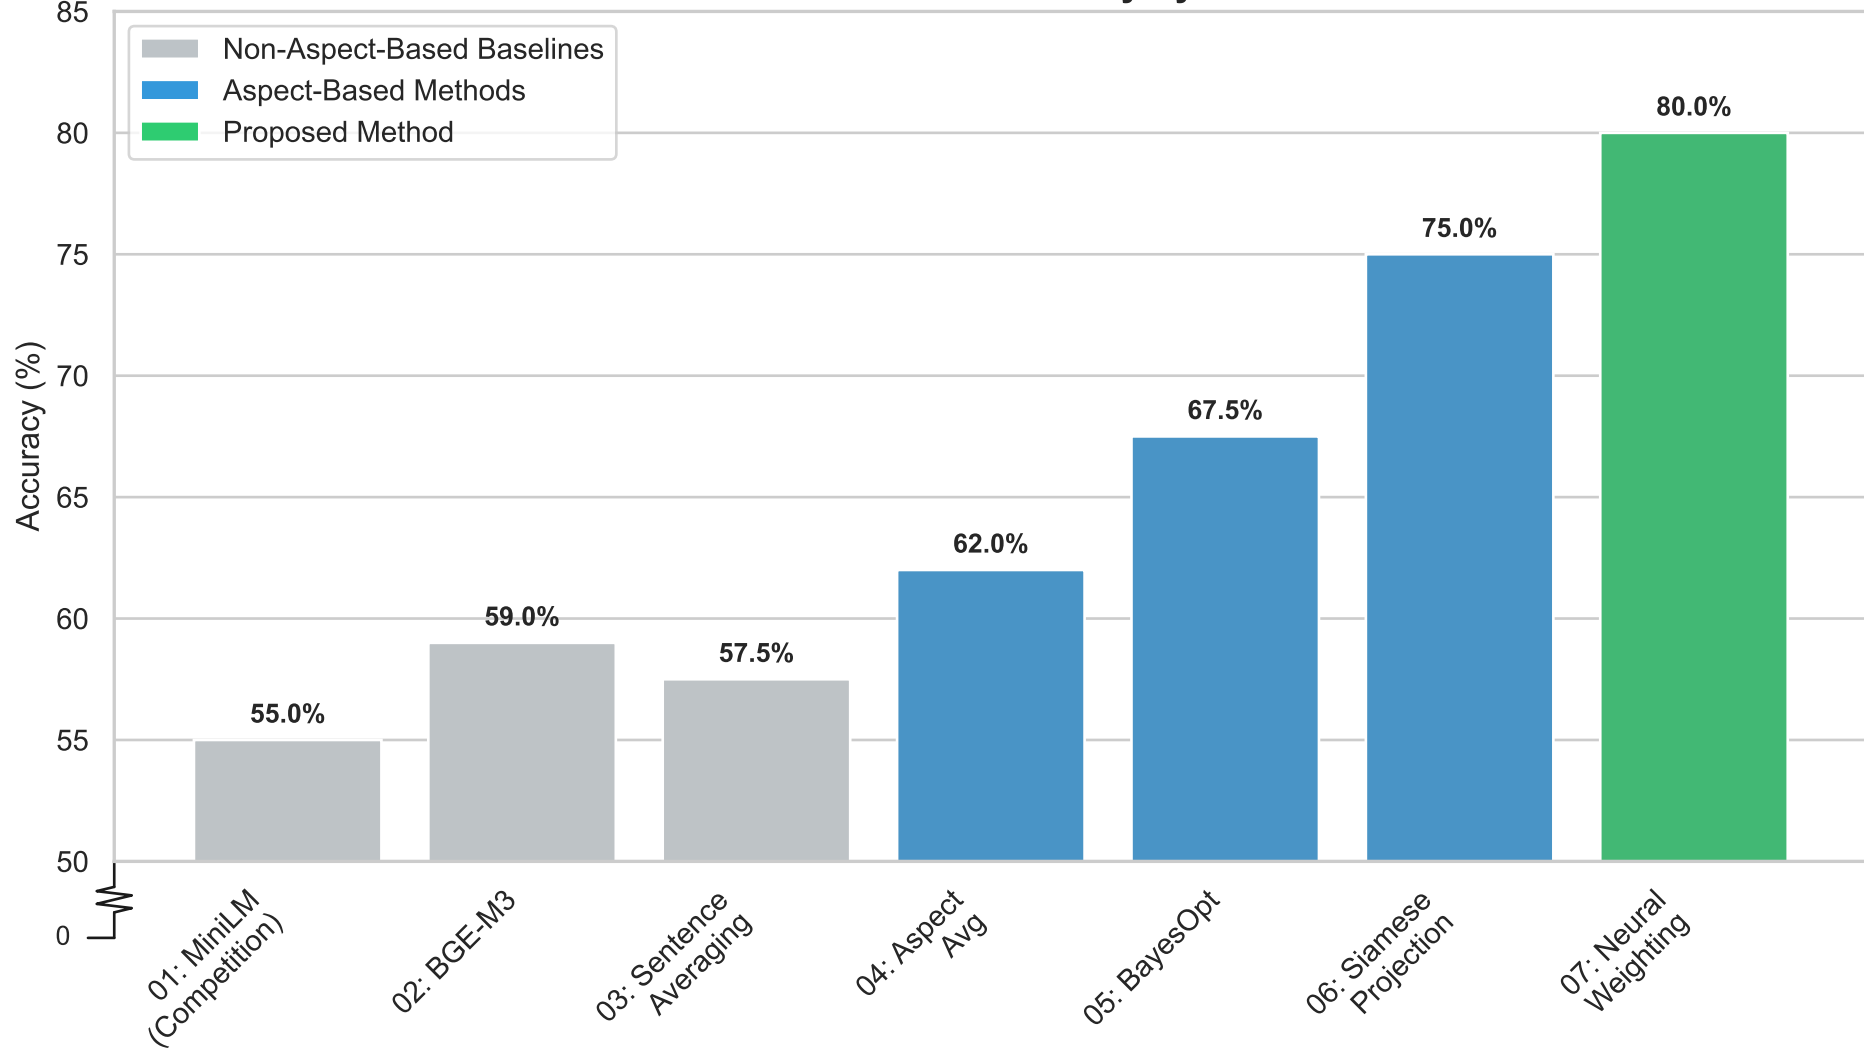

Supplement: SupplementaryMaterial [file accuracy_comparison.pdf › accuracy_comparison.pdf]

## Learned Aspect Weights (Learned Weighted Averaging)

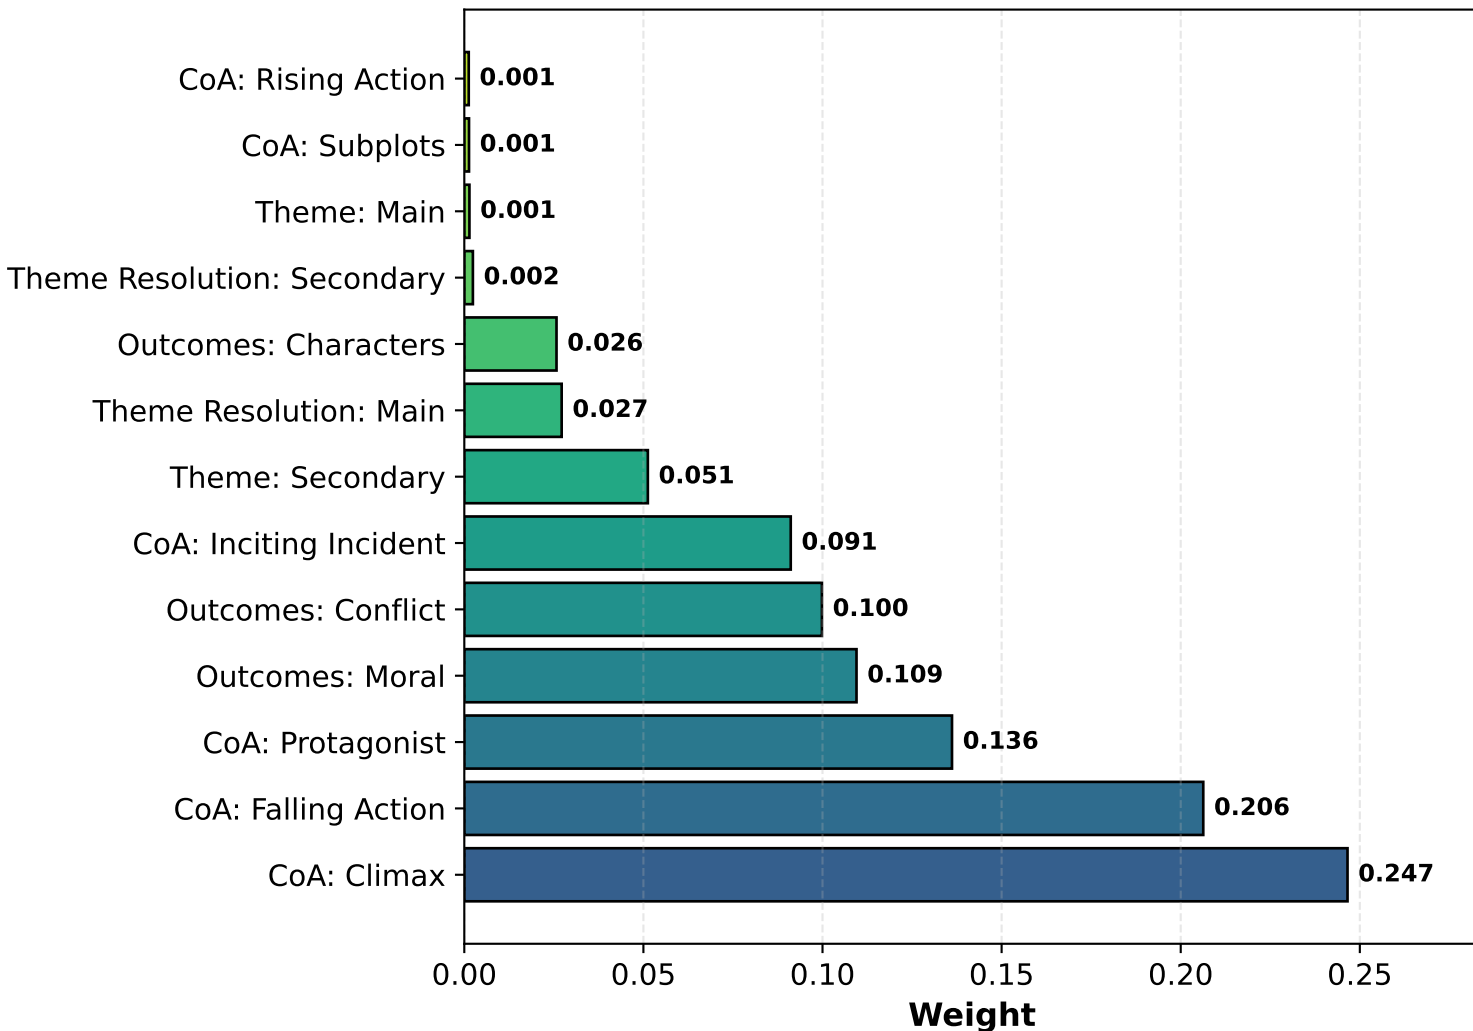

Supplement: SupplementaryMaterial [file learned_weights.pdf › learned_weights.pdf]

# Distribution of Sentence Complexity

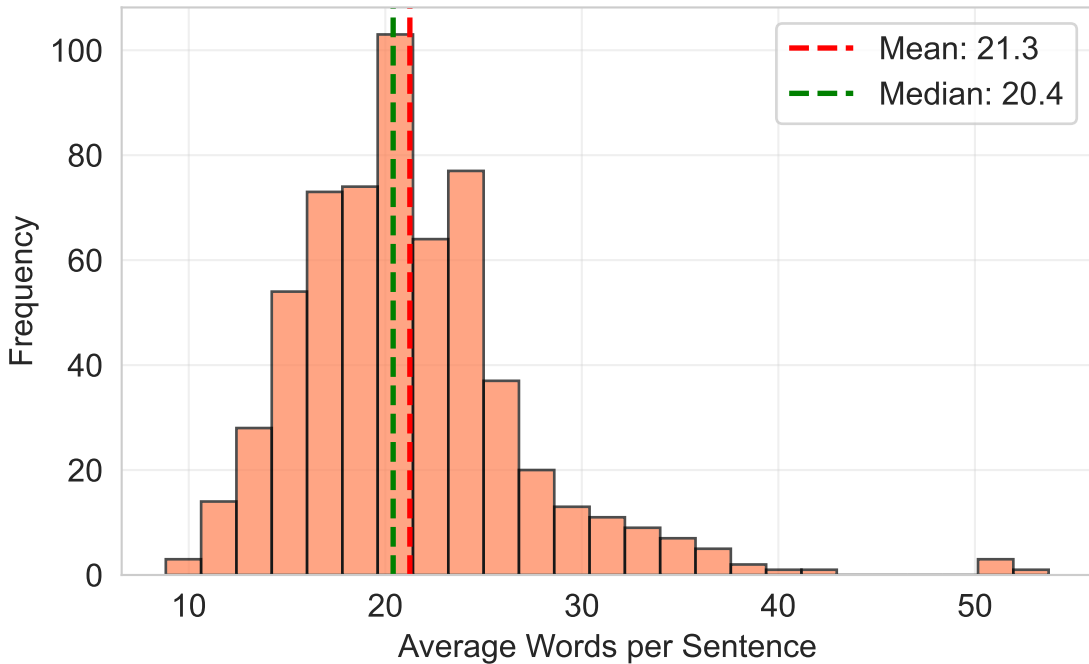

Supplement: SupplementaryMaterial [file sentence_length_distribution.pdf › sentence_length_distribution.pdf]

# Distribution of Story Lengths

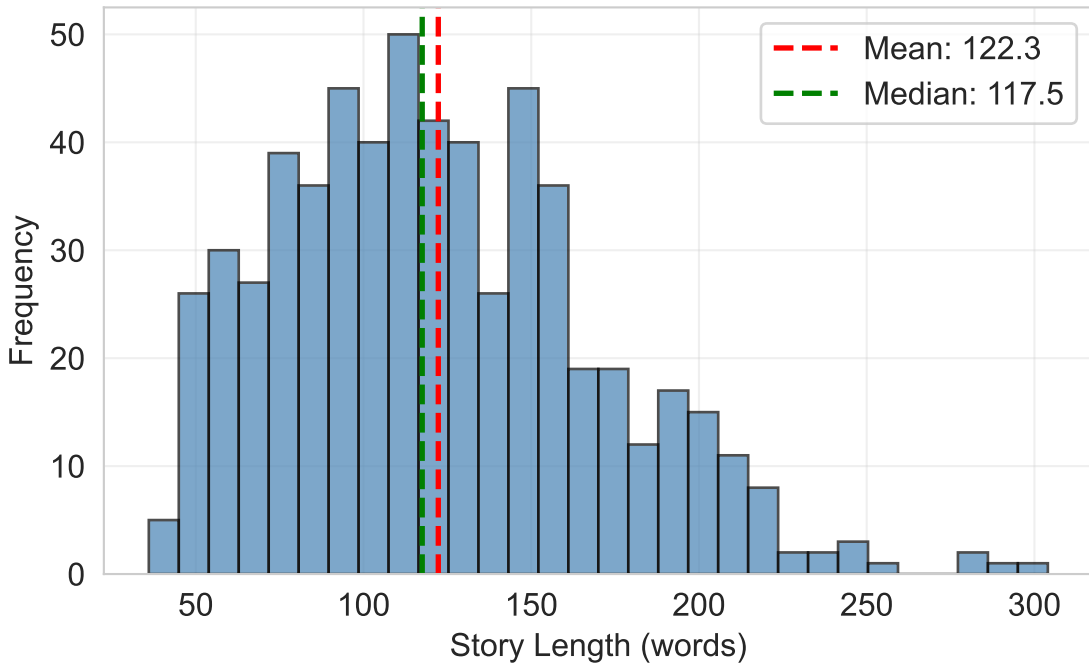

Supplement: SupplementaryMaterial [file story_length_distribution.pdf › story_length_distribution.pdf]
